# Supplementary material for: Gut microbiota from patients with mild COVID-19 cause alterations in mice that resemble post-COVID syndrome
Source: Research Square preprint supplement (doi:10.21203/rs.3.rs-1756189/v1), 2022-06-22
Supplement: Supplementary file 1 [file 537dd1898e5786ddd08aa6c1.xlsx]

## Sheet: Plan1
Additional File 3: Table S2: Brazilian food characteristics used for the feeding score.
Group	Food group	Characteristics
A	Ultraprocced food	Chocolate, ice cream, pudding, mousse, cereal bar
		Sausage, salami, bologna, sausage, hamburger, turkey meat, chorizo
		Mayonnaise, margarine, whipped cream
		Ready sauces, frozen and ready-to-heat products
		Breads, cakes and cookies
		Pizza, French Fries, Chips, Instant Noodles
B	Fiber source foods	Fruits (Papaya, pear, grape, mango, guava, tangerine, pineapple, plum, watermelon, avocado, jabuticaba, acerola)
		Vegetables (Pumpkin, carrot, okra, chayote, cucumber, pepper, eggplant, pumpkin, cabbage, cauliflower, broccoli, radish, green beans, potato, Lettuce, cabbage, chicory, taioba, mustard, spinach, watercress, chard)
C	Functional foods	Beans, soy
		Oatmeal, honey, roll, curd
		Banana, apple, orange, lemon
		Tomatoes, beets, sweet potatoes, yacon potatoes, sauerkraut
		Soluble fiber (Garlic, Onion, Garlic)
		Probiotics (Yakult, Activia, Actimel, Kefir, Chamyto, Simfort)

## Sheet: Planilha1
Additional File 3: Table S2: Brazilian food characteristics used for the feeding score
Group	Food Group	Characteristics
A	Ultraprossed foods	Chocolate, ice cream, pudding, mousse, cereal bar
		Sausage, salami, bologna, sausage, hamburger, turkey meat, chorizo
		Mayonnaise, margarine, whipped cream
		Ready sauces, frozen and ready-to-heat products
		Breads, cakes and cookies
		Pizza, French Fries, Chips, Instant Noodles
B	Fiber source foods	Fruits (Papaya, pear, grape, mango, guava, tangerine, pineapple, plum, watermelon, avocado, jabuticaba, acerola)
		Vegetables (Pumpkin, carrot, okra, chayote, cucumber, pepper, eggplant, pumpkin, cabbage, cauliflower, broccoli, radish, green beans, potato, Lettuce, cabbage, chicory, taioba, mustard, spinach, watercress, chard)
C	Functional foods	Beans, soy
		Oatmeal, honey, roll, curd
		Banana, apple, orange, lemon
		Tomatoes, beets, sweet potatoes, yacon potatoes, sauerkraut
		Soluble fiber (Garlic, Onion, Garlic)
		Probiotics (Yakult, Activia, Actimel, Kefir, Chamyto, Simfort)
