# Supplementary material for: Gut microbiota from patients with mild COVID-19 cause alterations in mice that resemble post-COVID syndrome
Source: Research Square preprint supplement (doi:10.21203/rs.3.rs-1756189/v1), 2022-06-22
Supplement: Supplementary file 2 [file 89b93d3ca7cebe5c185522bb.xlsx]

## Sheet: Parameters 
Additional File 1: Table S1: The flow chart for the human study
Parameters		Non-COVID-19	Assymptomatic	Symptomatic
Gender, n (%)		n = 59 (45.0%)	n = 8 (6.1%)	n = 64 (48.8%)
Male		19 (32.2%)	2 (25.0%)	24 (37.5%)
Female		40 (67.8%)	6 (75.0%)	40 (62.5%)
Age Group, n (%)
<18 years		3 (5.1%)	-	2 (3.1%)
18-39 years		43 (72.9%)	3 (37.5%)	45 (70.3%)
40-49 years		5 (8.5%)	2 (25.0%)	11 (17.2%)
50-59 years		7 (11.9%)	3 (37.5%)	5 (7.8%)
> 60 years		1 (1.7%)	-	1 (1.7%)
Body Mass Index, n (%)
Underweight		2 (3.4%)	1 (12.5%)	4 (6.2%)
Normal weight		29 (49.15%)	3 (37.5%)	31 (48.4%)
Overweight		19 (32.2%)	3 (37.5%)	20 (31.2%)
Obesity class I		4 (6.8%)	-	8 (12.5%)
Obesity class II		3 (5.1%)	-	1 (1.6%)
Symptoms during COVID-19, n (%)
Headache		-	-	47 (73.4%)
Fadigue		-	-	45 (70.3%)
Cough		-	-	40 (62.5%)
Anosmia		-	-	39 (60.9%)
Coryza or stuffy nose		-	-	37 (57.8%)
Myalgia		-	-	37 (57.8%)
Dysgeusia		-	-	36 (56.2%)
Fever ≥ 37,8ºC		-	-	29 (45.3%)
Chills		-	-	21 (32.8%)
Sore throat		-	-	20 (31.2%)
Dyspnea		-	-	12 (18.7%)
Conjunctivitis		-	-	3 (4.7%)
Gastrointestinal symptoms, n (%)
Diarrhea		-	-	22 (34.4%)
Appetite loss		-	-	19 (29.7%)
Nausea		-	-	11 (17.2%)
Abdominal pain		-	-	7 (10.9%)
Vomiting		-	-	3 (4.7%)
